# Supplementary material for: Question-answering system extracts information on injection drug use from clinical notes
Source: PubMed Central journal article supplement (PMC10991373; doi:10.1038/s43856-024-00470-6), 2024-04-03
Supplement: 43856_2024_470_MOESM1_ESM.pdf [file 43856_2024_470_MOESM1_ESM.pdf]

## Supplementary Information

### Title: Question-Answering System Extracts Information on Injection Drug Use from Clinical Notes

**Authors:** Maria Mahbub<sup>1</sup>, Ian Goethert<sup>2</sup>, Ioana Danciu<sup>3,4</sup>, Kathryn Knight<sup>2</sup>, Sudarshan Srinivasan<sup>1</sup>, Suzanne Tamang<sup>5,6</sup>, Karine Rozenberg-Ben-Dror<sup>7</sup>, Hugo Solares<sup>5</sup>, Susana Martins<sup>5</sup>, Jodie Trafton<sup>5</sup>, Edmon Begoli<sup>1</sup>, and Gregory D. Peterson<sup>8</sup>

#### Affiliations:

1. Cyber Resilience and Intelligence Division, Oak Ridge National Laboratory, Oak Ridge, TN, USA
2. Information Technology Services Division, Oak Ridge National Laboratory, Oak Ridge, TN, USA
3. Computational Sciences and Engineering Division, Oak Ridge National Laboratory, Oak Ridge, TN, USA
4. Department of Biomedical Informatics, Vanderbilt University, Nashville, TN, USA
5. Program Evaluation and Resource Center, Office of Mental Health and Suicide Prevention, Department of Veterans Affairs, USA
6. Department of Medicine, Stanford University School of Medicine, Stanford, CA, USA
7. Veterans Affairs Great Lakes Health Care System, Westchester, IL, USA
8. Department of Electrical Engineering and Computer Science, University of Tennessee, Knoxville, Knoxville, TN, USA

## Supplementary Tables

**Supplementary Table 1:** A detailed list of co-occurring phrases before/after IDU keywords along with the parsing rules, targeted pattern type, and examples of answers before and after parsing. Abbreviations: IDU, Injection Drug Use; h/o, history of; ivdu, intravenous drug use; hx, history; pmh, past medical history; hpi, history of present illness; sud, substance use disorder; oud, opioid use disorder.

| Targeted Patterns                                                                   | Co-occurring Phrases Before/After IDU Keywords                                                                                                                                                                                                                            | Parsing Rules                                                                                                                                                                                       | Example Answers Before and After Parsing                                                                                                                                                                                 |
|-------------------------------------------------------------------------------------|---------------------------------------------------------------------------------------------------------------------------------------------------------------------------------------------------------------------------------------------------------------------------|-----------------------------------------------------------------------------------------------------------------------------------------------------------------------------------------------------|--------------------------------------------------------------------------------------------------------------------------------------------------------------------------------------------------------------------------|
| Negations (nullifying the existence of IDU/skin popping/track marks/needle sharing) | Negation Phrases (NP): den(ing/ies/ied), no, never                                                                                                                                                                                                                        | <b>Sentence:</b> <text before NP> <u>NP</u> <text after NP containing keywords><br><b>Rule:</b> <u>NP</u> <text after NP containing keywords>                                                       | <b>Before:</b> 65y/o m w cardiac procedures, or recent surgical procedures, admits to drinking alcohol daily for the past 10 years, <u>denies</u> any history of ivdu<br><b>After:</b> <u>denies</u> any history of ivdu |
| Temporal information (active/ historical/last/frequency of use)                     | Temporal Phrases (TempP): past/remote/distant/prior/previous/former/active/current/recent/last/long history/hx (or h/o), daily, occasional, past, remote, distant, prior, previous, former, active, current, recent, last, long, intermittent, hpi, history, hx, h/o, pmh | <b>Sentence:</b> <text before TempP> <u>TempP</u> <text after TempP containing keywords><br><b>Rule:</b> <u>TempP</u> <text after TempP containing keywords>                                        | <b>Before:</b> pt smokes cannabis, has a h/o ivdu but none now, went to rehab 2070<br><b>After:</b> <u>h/o</u> ivdu but none now, went to rehab 2070                                                                     |
| Additional temporal information                                                     | Additional Temporal Phrases (ATP): year(s)/yr(s)/month(s)/mnth(s)/day(s)/d/wk/wks/mos ago                                                                                                                                                                                 | <b>Sentence:</b> <TempP> <text after TempP and before ATP containing keywords> <u>ATP</u> <text after ATP><br><b>Rule:</b> <TempP> <text after TempP and before ATP containing keywords> <u>ATP</u> | <b>Before:</b> last ivdu was 10 <u>days ago</u> , snorts cocaine occasionally<br><b>After:</b> last ivdu was 10 <u>days ago</u>                                                                                          |
| Opioid/substance use disorder specific to IDU                                       | Phrases related to Substance use disorder (SP): substance/polysubstance use/abuse disorder, sud, psud, oud, polysubstance, opioid use disorder, opioid, opiate                                                                                                            | <b>Sentence:</b> <text before SP> <u>SP</u> <text after SP containing keywords><br><b>Rule:</b> <u>SP</u> <text after SP containing keywords>                                                       | <b>Before:</b> 200m w niddm, htn, bipolar disorder and <u>oud</u> (iv heroin) on methadone maintenance, recent heroin relapse<br><b>After:</b> <u>oud</u> (iv heroin) on methadone maintenance, recent heroin relapse    |
| Status of track marks                                                               | Phrases related to Track Mark status (TMP): arm(s)/abnormal/multiple/many/several/healing/healed/old/diffuse/localized/visible/red/iv/fresh/dark/needle/notable                                                                                                           | <b>Sentence:</b> <text before TMP> <u>TMP</u> <text after TMP containing “track marks”><br><b>Rule:</b> <u>TMP</u> <text after TMP containing “track marks”>                                        | <b>Before:</b> comments: extremities: mid line in upper right arm, scars and <u>old</u> track marks noted on mid arm<br><b>After:</b> <u>old</u> track marks noted on mid arm                                            |

**Supplementary Table 2:** Mappings between the query groups and the words in gold-standard answers most likely to provide inquired information and example answers for each mapping.

| Query Groups                 | Words in Gold-standard Answers Most Likely to Provide Inquired Information       | Sample Answers                                       |
|------------------------------|----------------------------------------------------------------------------------|------------------------------------------------------|
| Drug names                   | IV drug names from Table 2, opioid, opiate, oud                                  | recent ivdu with <u>meth</u> and <u>heroin</u>       |
| Visible signs of IDU         | Phrases for visible signs of IDU from Table 2                                    | multiple <u>track marks</u> over extremities         |
| Risky needle-using behavior  | Phrases for risky needle-using behavior from Table 2                             | h/o <u>sharing needles</u> with gf                   |
| Active/historical use        | Temporal phrases from Supplementary Table 1, remission                           | <u>active</u> iv drug user up to day of admission    |
| Frequency of use             | daily, occasional, regularly, often, sometimes, frequently, intermittent         | - iv cocaine <u>daily</u> , ~\$5-40/day              |
| Last use                     | Additional temporal phrases from Supplementary Table 1, last, quit, since, clean | <u>last</u> ivdu >30 years ago                       |
| Skin popping                 | Phrases for skin popping from Table 2                                            | h/o drug injections - skin popping                   |
| Harm reduction interventions | Phrases for harm reduction interventions from Table 2                            | patient participates in <u>clean syringe program</u> |
| Existence of IDU             | Negation phrases from Supplementary Table 1                                      | <u>denies</u> any ivdu for many years                |
| Existence of IDU             | Remaining answers                                                                | iv drug user                                         |

**Supplementary Table 3:** Statistics of the gold-standard dataset.

| Property                     | Statistics                                   |
|------------------------------|----------------------------------------------|
| #Patients                    | 1145                                         |
| #Notes                       | 2323                                         |
| #Notes per patient (average) | 2.03                                         |
| #Samples in dataset          | 17410                                        |
| #QA per note (average)       | 7.49                                         |
| Note length (in words)       | 1013.09 (average), 1029 (median), 1785 (max) |
| Question length (in words)   | 6.72 (average), 7 (median), 14 (max)         |
| Answer length (in words)     | 7.52 (average), 6 (median), 64 (max)         |

**Supplementary Table 4:** Statistics of the additional test datasets built using Cohort-Short and Cohort-Long.

| Property                     | Statistics                                      |                                                 |
|------------------------------|-------------------------------------------------|-------------------------------------------------|
|                              | Test Dataset (Cohort-Short)                     | Test Dataset (Cohort-Long)                      |
| #Patients                    | 100                                             | 100                                             |
| #Notes                       | 203                                             | 146                                             |
| #Notes per patient (average) | 2.03                                            | 1.46                                            |
| #Samples in dataset          | 1985                                            | 1110                                            |
| #QA per note (average)       | 9.78                                            | 7.60                                            |
| Note length (in words)       | 1336.53 (average),<br>1117 (median), 5154 (max) | 1618.86 (average),<br>1224 (median), 5747 (max) |
| Question length (in words)   | 6.51 (average),<br>7 (median), 14 (max)         | 6.92 (average),<br>7 (median), 14 (max)         |
| Answer length (in words)     | 7.59 (average),<br>7 (median), 21 (max)         | 8.56 (average),<br>7 (median), 43 (max)         |

**Supplementary Table 5:** Examples of answers predicted by the QA model along with the question and the gold-standard answers.

| Question                                                                             | Gold-standard Answer                                                                                                      | Predicted Answer                                                                                                               |
|--------------------------------------------------------------------------------------|---------------------------------------------------------------------------------------------------------------------------|--------------------------------------------------------------------------------------------------------------------------------|
| Has the pt ever injected drugs?                                                      | iv drug use: []yes [x]no                                                                                                  | iv drug use: []yes [x]no                                                                                                       |
| Which injection drugs?                                                               | iv heroin                                                                                                                 | attempted to overdose with the intent to die via iv heroin use                                                                 |
| Does the patient have any physical evidence of IDU?                                  | scars and old track marks                                                                                                 | old track marks noted on mid arm                                                                                               |
| Does the pt have a h/o needle-sharing or using dirty needles?                        | sharing needles/injectin heroin/ cocaine in the past                                                                      | pos sharing needles                                                                                                            |
| Is the patient actively using IV drugs?                                              | h/o iv heroin use about 7 years ago one time, but denies any iv drug use since                                            | remote h/o iv heroin use about 7 years ago one time, but denies any iv drug use since.                                         |
| What is the frequency of pt's injection drug use?                                    | daily heroin use with extensive ivdu                                                                                      | daily heroin use with extensive ivdu                                                                                           |
| Does the patient have any history of skin popping?                                   | "skin popping" heroin 3-4 days ago                                                                                        | admits to "skin popping" heroin 3-4 days ago and showed the under-signed a keloid scar on his left hand due to shooting heroin |
| When has the pt last injected drugs?                                                 | quit iv heroin and cocaine x 6 weeks                                                                                      | quit iv heroin and cocaine x 6 weeks                                                                                           |
| Has the patient received any harm reduction interventions specific to IDU behaviors? | topic covered: hiv, viral hepatitis, safe sex practices, pre-exposure prophylaxis syringe service program, naloxone usage | syringe service program                                                                                                        |

# Supplementary Figures

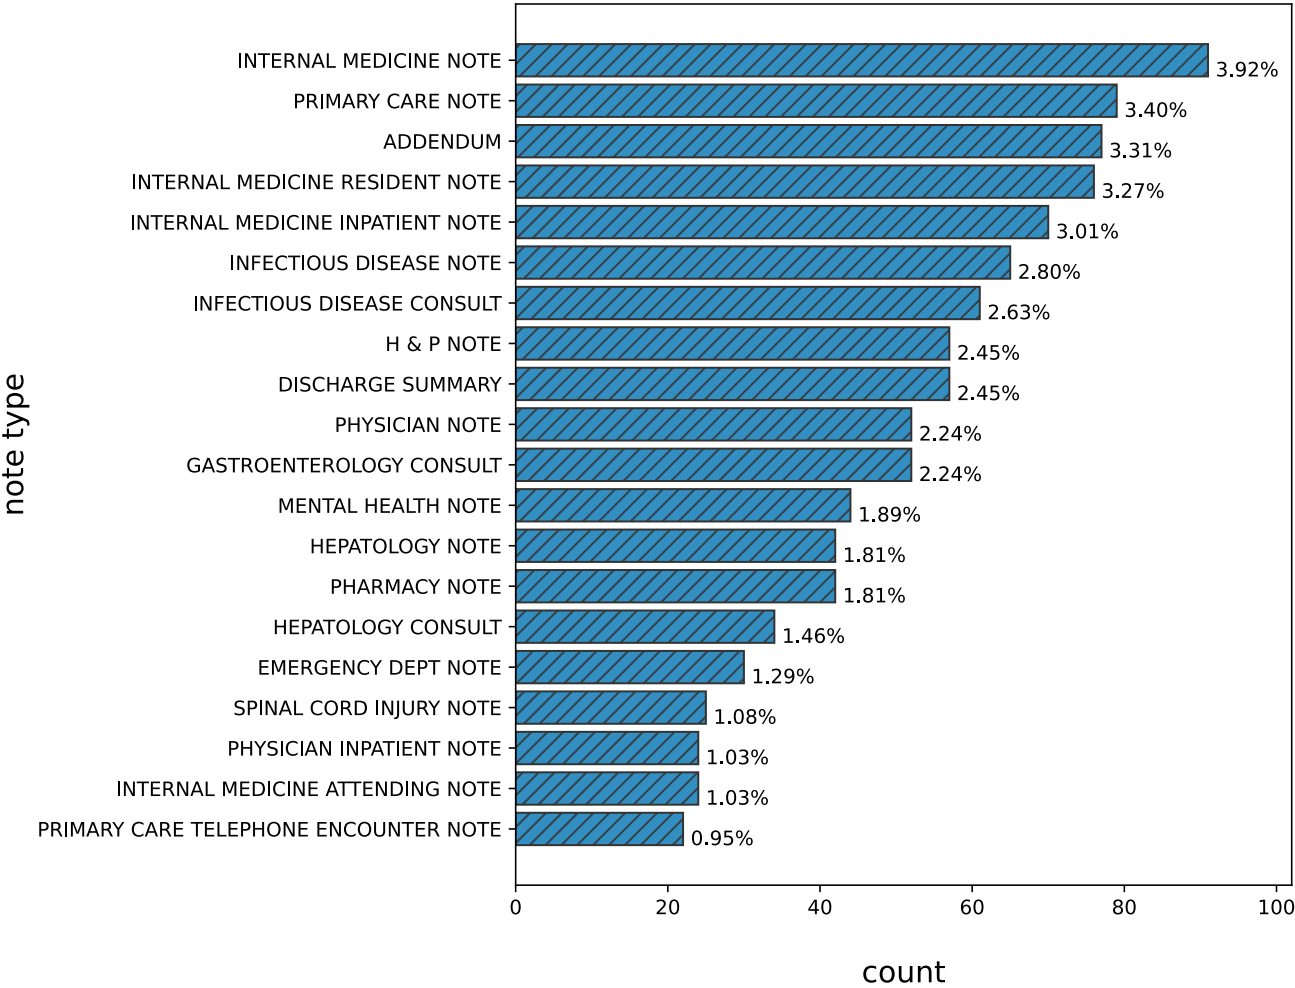

**Supplementary Figure 1:** Twenty most frequently encountered clinical note types in this study, along with their frequency distribution.

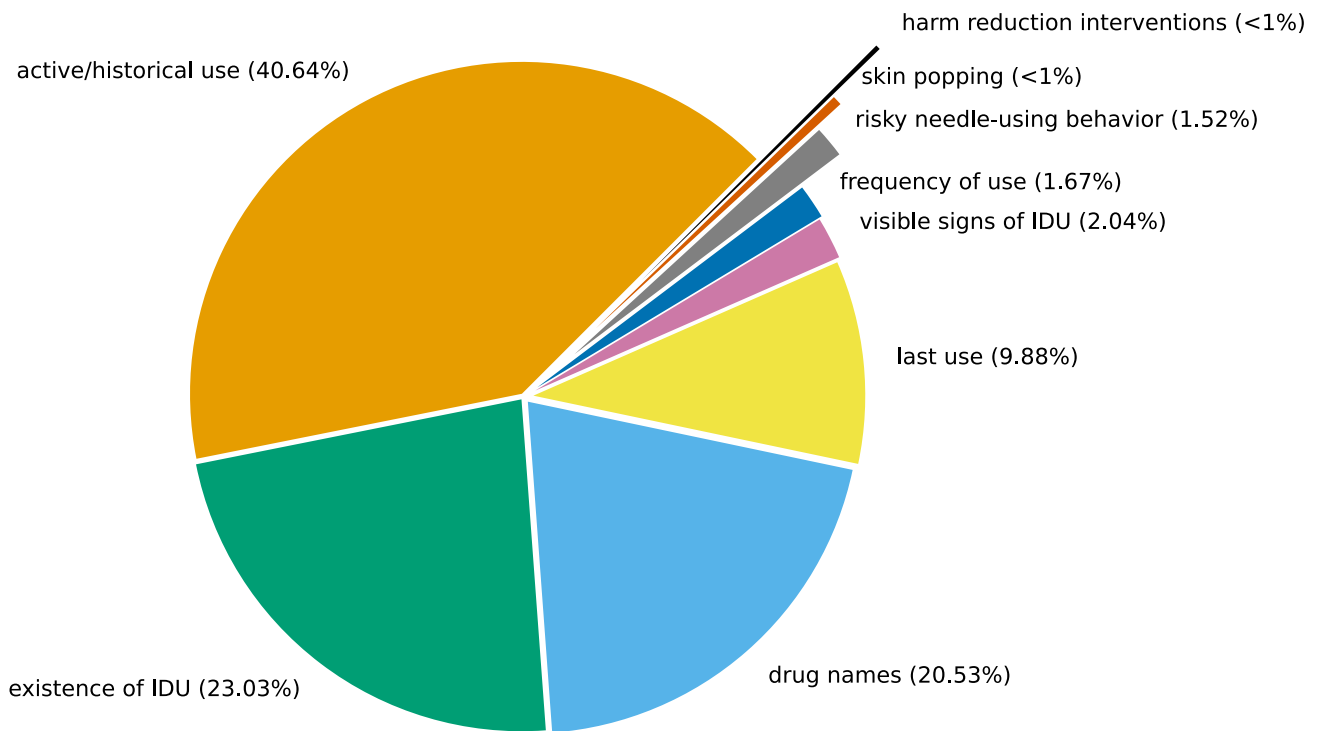

**Supplementary Figure 2:** Distribution of the query groups in the gold-standard dataset

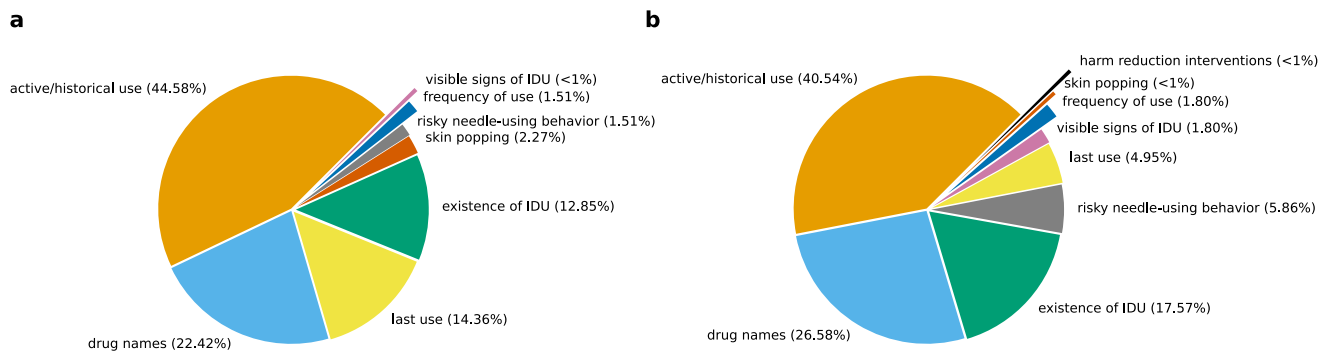

**Supplementary Figure 3:** Distribution of query groups in additional test datasets built using Cohort-Short (a) and Cohort-Long (b).
