# Supplementary material for: Question-answering system extracts information on injection drug use from clinical notes
Source: PubMed Central journal article supplement (PMC10991373; doi:10.1038/s43856-024-00470-6), 2024-04-03
Supplement: 43856_2024_470_MOESM2_ESM.pdf [file 43856_2024_470_MOESM2_ESM.pdf]

## 1 **Description of Additional Supplementary Files**

2

3 **File Name:** Supplementary Data 1

4 **Description:** Supplementary Data 1 contains the source data for Figure 3.

5

6 **File Name:** Supplementary Data 2

7 **Description:** Supplementary Data 2 contains the source data for Figure 4.

8
